1 **Analysis of cell-specific peripheral blood biomarkers in**  
2 **severe allergic asthma identifies innate immune**  
3 **dysfunction**

4 Ben Nicholas<sup>1</sup>, Jane Guo<sup>2</sup>, Hyun-Hee Lee<sup>2</sup>, Alistair Bailey<sup>3</sup>, Rene de Waal Malefyt<sup>4</sup>,  
5 Milenko Cicmil<sup>2</sup> and Ratko Djukanovic<sup>1</sup>

6 <sup>1</sup> Division of Clinical and Experimental Sciences, University of Southampton Faculty  
7 of Medicine, Southampton General Hospital, Hampshire, United Kingdom

8 <sup>2</sup> Oncology & Immunology Discovery, Merck Research Laboratories, Boston, MA,  
9 United States of America

10 <sup>3</sup> Cancer Sciences, University of Southampton Faculty of Medicine, Southampton  
11 General Hospital, Hampshire, United Kingdom

12 <sup>4</sup> Merck Research Laboratories, Palo Alto, California, United States of America

13 **ORCIDs:**

14 Ben Nicholas: 0000-0003-1467-9643

15 Jane Guo:

16 Hyun-Hee Lee:

17 Alistair Bailey: 0000-0003-0023-8679

18 Rene de Waal Malefyt: 0000-0002-2663-383X

19 Milenko Cicmil:

20 Ratko Djukanovic: 0000-0001-6039-5612

21

22 **Running title:** Peripheral blood biomarkers of severe asthma

23 **Keywords:** Asthma, biomarkers, allergy, peripheral, transcriptomic

24 **Correspondence to:**

25 Dr Ben Nicholas

26 Centre for Proteomic Research

27 B85, Life Sciences Building

28 University of Southampton

29 University Road

30 Highfield

31 Southampton, Hants.

32 SO17 1BJ

33 Tel No: +44(0)2380 59 5503

34 Email: [bln1@soton.ac.uk](mailto:bln1@soton.ac.uk)

35 **Abstract**

36 Asthma is a disease of complex origin and multiple pathologies. There are currently  
37 very few biomarkers of proven utility in its diagnosis, management or response to  
38 treatment. Recent studies have identified multiple asthma phenotypes following  
39 biofluid analysis; however, such findings may be driven by the well-characterised  
40 alterations in immune cell populations in asthma. We present a study designed to  
41 identify cell type-specific gene signatures of severe allergic asthma in peripheral  
42 blood samples. Using transcriptomic profiling of four magnetically purified peripheral  
43 blood cell types, we identify significant gene expression changes in monocytes and  
44 NK cells but not T lymphocytes in severe asthmatics. Pathway analysis indicates  
45 dysfunction of immune cell regulation and bacterial suppression in the NK cells.  
46 These gene expression changes may be useful on their own as prognostic  
47 peripheral blood cell markers of severe asthma, but also may indicate novel cell  
48 pathways for therapeutic intervention.

49 Asthma is a common chronic airways disease with complex aetiology, having no  
50 single causative genetic trigger, and with multiple factors appearing to contribute to  
51 disease pathogenesis<sup>1</sup>. Thus, asthma can manifest in numerous different  
52 pathologies related to severity and the degree of allergy or response to therapeutic  
53 intervention. Currently, the principal clinical biomarkers for initial diagnosis and  
54 staging of disease severity include lung function and hyper-responsiveness tests.  
55 Sometimes fractional exhaled nitric oxide (FeNO) is used as a surrogate for direct  
56 measurement of eosinophils. Improvement of clinical symptoms following  
57 therapeutic intervention and assessment of atopy and a history of wheeze are also  
58 useful.

59 Monitoring of the disease is generally through symptom assessment and therapeutic  
60 dose requirements combined with periodic lung function tests. Novel approaches,  
61 such as immunotherapy, have identified the utility of additional biomarkers such as  
62 IgE or sputum inflammatory cell counts as inclusion criteria; however, in clinical  
63 practice, often the principal read-outs remain the generalised clinical ones. No  
64 single test provides definitive evidence of asthma, its severity or therapeutic efficacy  
65 of drugs.

66 Recent reports identified multiple disease phenotypes using unbiased clustering of  
67 genomic and proteomic data from airway samples<sup>2</sup>. Likewise, mRNA signatures of  
68 severe asthma have been identified in whole blood<sup>3</sup>. The importance of such studies  
69 may be confounded by known changes in inflammatory cell profiles in asthma, thus,  
70 missing changes in blood cell-subtypes by defining the phenotypic clusters of  
71 subjects based on inflammatory cell predominance in biofluids.

72 Our approach was to gene expression markers of cell type and asthma in four  
73 peripheral blood cell populations. We recruited 11 severe allergic asthmatics on step  
74 4 of BTS/Sign management, and 10 healthy control subjects (see Table 1 for a  
75 summary of patient characteristics). Participants signed written informed consent.

76 **Table 1. Clinical characteristics for the healthy and moderate/severe allergic**  
 77 **asthmatic cohorts.**

|                             | Healthy controls    | Severe allergic asthmatics | p value   |
|-----------------------------|---------------------|----------------------------|-----------|
| N                           | 10                  | 11                         | -         |
| Gender (M/F)                | 3/7                 | 3/8                        | -         |
| Age                         | 42.5 (31-53)        | 43 (31-50)                 | 0.87      |
| Atopy (yes)                 | 0                   | 11                         | -         |
| Total blood IgE             | 16.45 (10.7-27.8)   | 163.9 (71.4-315.0)         | 0.0003*** |
| Blood lymphocytes           | 1.9 (1.75-2.125)    | 1.9 (1.7-2.1)              | 0.345     |
| Blood eosinophils (%)       | 0.1 (0.1-0.2)       | 0.2 (0.1-0.3)              | 0.212     |
| Pre FEV1                    | 3.11 (2.89-4.13)    | 2.58 (2.15-3.49)           | 0.043*    |
| Pre FEV1 % predicted        | 111.4 (105.3-117.1) | 100 (77.2-102.4)           | 0.016*    |
| Post FEV1                   | 3.19 (3.04-4.19)    | 3.00 (2.37-3.66)           | 0.067     |
| Post FEV1 % predicted       | 114.1 (107.7-119.4) | 100.6 (86.2-114.7)         | 0.055     |
| Sputum eosinophils (%)      | 0                   | 1.69 (0-3.68)              | 0.046*    |
| Sputum neutrophils (%)      | 11.36 (7.1-15.7)    | 64.46 (21.9-74.2)          | 0.006**   |
| PBMC CD4+ (% of CD3+)       | 65.9 (53.5-71.2)    | 70.3 (58.5-78.5)           | 0.251     |
| PBMC CD8+ (% of CD3+)       | 26.7 (18.6-33.0)    | 23.9 (16.8-26.5)           | 0.340     |
| PBMC monocytes (% of CD45+) | 11.7 (10.2-16.4)    | 12.8 (8.7-14.0)            | 0.878     |
| PBMC NK cells (% of Cd45+)  | 11.1 (8.8-19.5)     | 10.6 (7.4-11.7)            | 0.314     |

Mann Whitney tests, \*p<0.05, \*\*p<0.01, \*\*\*p<0.001 Data shown are medians (+/- interquartile range)

78

79 Fresh blood was drawn and PBMCs were isolated from buffy coats. Flow cytometry  
 80 determined no significant differences in the relative proportions of four immune cell  
 81 populations, monocytes, NK cells, CD4+ and CD8+ T cells in the peripheral blood of  
 82 healthy and severe asthmatic subjects (Table 1).

83 Four cell populations were sequentially enriched from  $4 \times 10^7$  PBMCs from each  
 84 subject using magnetic beads conjugated to monoclonal antibodies targeting

85 different cell surface markers, namely CD14 (monocytes), CD56 (NK/NK-T cells),  
86 CD8 (CD8+ T cells), and CD4 (CD4+ T cells) in that order. This yielded populations  
87 highly enriched (>99%) for each selective marker.

88 Quantification of gene expression used isolated RNA from the four enriched cell  
89 populations, analysed by a 770 gene nCounter pan cancer immune profiling array  
90 (NanoString Technologies).

91 Unbiased principal component analysis (PCA) of the purified cell gene expression  
92 profiles robustly separated the four target cell populations (Figure 1A). The genes  
93 primarily driving cluster separation of each cell type, and as such indicative of cell-  
94 specific biomarkers, confirm the purity of our immune blood cell populations and add  
95 to the canon of knowledge on markers of these cell types (see online data  
96 supplement for cell-specific gene lists:  
97 <https://doi.org/10.6084/m9.figshare.19329068>).

98 For example, a major component of the monocyte cluster was CD14, which was to  
99 be expected since it was the target isolation molecule, but also includes 425 other  
100 genes contributing to this cluster, inclusive of the well-characterised monocyte-  
101 specific proteins such as CD68, CD163, L-selectin and S100A12.

102 T cells exhibit a well-defined cluster, however a small degree of overlap between the  
103 CD4+ and CD8 + T cell clusters, reflects the phenotypic similarity between these two  
104 cell types. Their combined cluster includes CD3 and CD8.

105 Similarly, our top-ranked genes contributing to the NK cell cluster are well-known  
106 phenotypic markers of NK cells, inclusive of KLRD1, NCAM-1 and EOMES.

107 Clusters were driven primarily by cell type. We found little evidence of segregation  
108 between health and asthma in these cell populations.

109 We then identified differentially expressed genes (DEGs) in asthma, adjusting for  
110 multiple tests for each cell type as appropriate. Volcano plots (Figure 1B) indicate  
111 two genes upregulated in asthmatic monocytes compared to healthy controls (IGF2R  
112 and C3AR1). IGF2R is upregulated in monocytes during differentiation into  
113 macrophages<sup>4</sup> but changes in IGF2R expression by monocytes in asthma have not  
114 previously been observed. C3AR1 has been previously identified as a susceptibility

115 gene for bronchial asthma<sup>5</sup>. To our knowledge, no previous studies have identified  
116 elevation of the C3AR1 in monocytes of severe asthmatics.

117 We found six upregulated (LILRA5, LILRB2 and SLC11A1, PDGFRB, LYN, CD97)  
118 and eight downregulated (LTB, RORC, GZMK, DPP4, RPS6, FLT3LG, DOCK9 and  
119 CD28) genes in CD56+ cells from asthmatics.

120 Several of these upregulated genes are associated with immune cell regulation. For  
121 example, the leukocyte immunoglobulin-like immunoregulatory checkpoint receptors  
122 LILRA5 and LILRB2 have both positive and negative regulatory properties, whereas  
123 LYN-dependent signalling is primarily a negative regulator of innate and adaptive  
124 immune responses<sup>6</sup>. Additionally, the PDGF pathway has a well described local  
125 airways role in asthma pathogenesis and airway remodelling. Increased systemic  
126 levels of PDGF ligands in the serum of asthmatics have been previously observed,  
127 however it has remained uncertain whether PDGF is a systemic biomarker of  
128 asthma<sup>7</sup>. Our study suggests that PDGF-receptor expression may provide evidence  
129 of systemic response to abnormal PDGF expression in asthma.

130 Another upregulated gene in asthmatic NK cells is involved in pathogen resistance;  
131 SLC11A1 plays a role in divalent metal ion transport, promoting anti-microbial  
132 pathogen responses. This protein is upregulated in local innate lymphocytic cell  
133 subtypes in asthma, augmenting their activation and biasing towards a Th1 rather  
134 than Th2 response. Abnormal SLC11A1 expression has previously been identified  
135 in asthmatic sputum cells<sup>8</sup>, attributed to localised bacterial exposure. Systemic  
136 changes in expression of SLC11A1 may reflect the disease severity and the  
137 consequent neutrophilic phenotype of our severe asthma cohort. However, the  
138 existence of SLC11A1 upregulation in the peripheral is suggestive of widespread  
139 systemic innate cell dysfunction.

140 Conversely, several genes downregulated in CD56+ cells of asthmatics (LTB,  
141 RORC, GZMK, DPP4, RPS6, FLT3LG, DOCK9 and CD28), are associated with  
142 proinflammatory, functional, cell or activation responses in NK cells. For example,  
143 lymphotoxin beta is a pro-inflammatory TNF- $\alpha$  superfamily member, granzyme K is a  
144 serine protease and component of cytotoxic granules in NK cells, and CD28 is a co-  
145 stimulatory molecule for NK cells. Interestingly, DPP4, which plays a role in NK cell

146 activation<sup>9</sup> is one of the ligands of IGF2R which is elevated in monocytes and may  
 147 be suggestive of common systemic pathway alterations in peripheral innate cells.

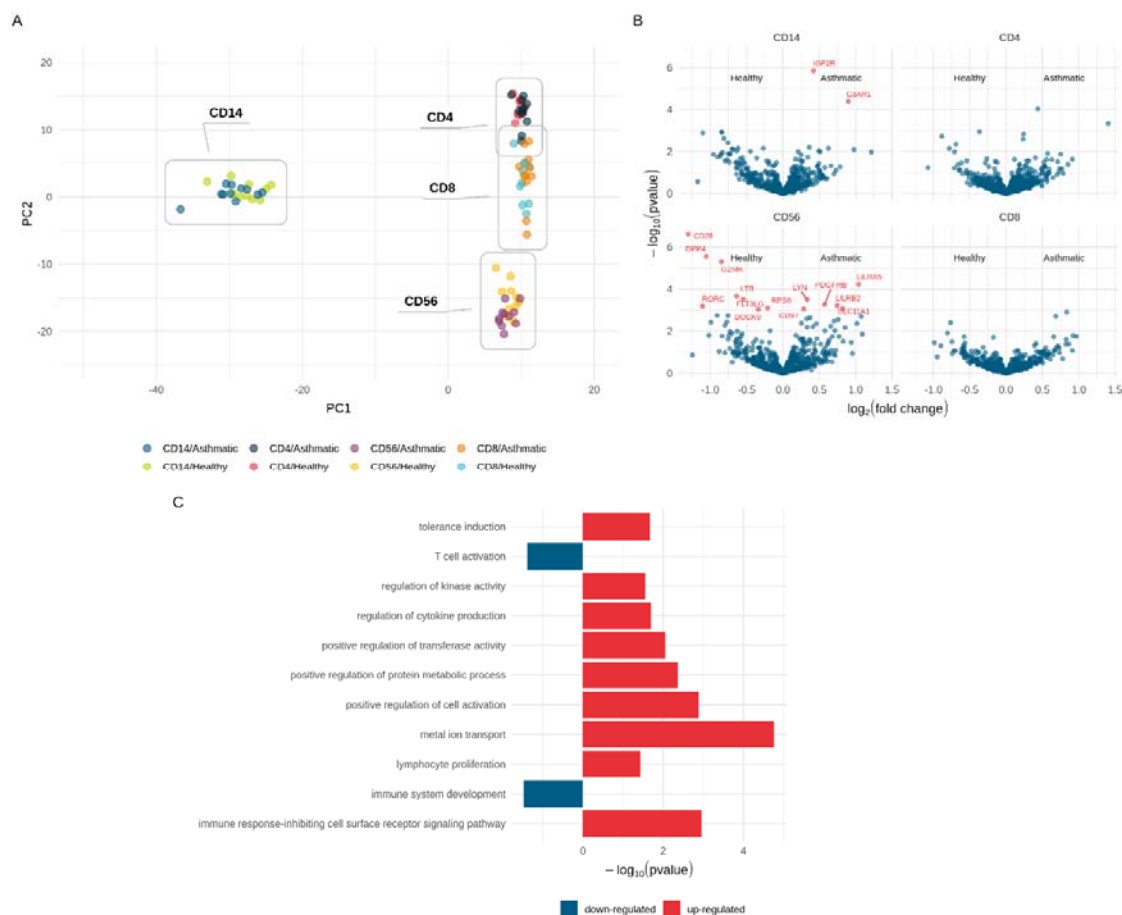

148

149 **Figure 1. Differential gene expression analysis in RNA transcripts in severe**

150 **asthma. (A)** PCA analysis of gene counts from all four cell types indicate clusters

151 corresponding to each cell type. **(B)** Volcano plots indicating genes significantly up or

152 down regulated in severe asthma in each cell type ( $p$ -adjusted  $< 0.05$ ). **(C)** Summary

153 of GO terms associated with differential gene expression in NK cells in asthma.

154 Pathway analysis using the differentially expressed genes in the NK cell-enriched

155 population (Figure 1C) confirmed that severe allergic asthma was associated with

156 upregulation of pathways involved in metabolism, divalent metal ion transport,

157 immune response inhibition, and immune regulation/tolerance, and with

158 downregulation of T cell activation and immune system development.

159 Overall, these data suggest that an increased tolerogenic environment accompanies

160 severe asthma, and NK cell dysfunctions that would impair the adaptive immune

161 response were observed that could reflect exhaustion or generalised impairment of  
162 these cells. In addition, they show enhanced anti-microbial responses in the absence  
163 of recent exacerbation. Although NK and NK-like cells have been examined in  
164 asthma, no fixed role for them has yet been assigned. Our study suggests that  
165 further investigation of these cells is warranted.

166 Additionally, monocytes in asthma show increases in gene expression associated  
167 with differentiation and chemotaxis. Thus, we find innate but not adaptive cell  
168 phenotypic changes in peripheral blood cells from severe asthmatics.

169 Given the increasing interest in innate immunity and its role in antimicrobial  
170 responses, these results suggest the value of further study of gene expression  
171 changes at times of acute asthma exacerbations.

172 The findings presented herein may help to identify new therapeutic avenues for  
173 severe asthma arising from innate immunity, and also may serve to identify new  
174 gene candidates as useful cell type-specific biomarkers.



175 **References**

- 176 1. Holgate, S.T., *et al.* Asthma. *Nat Rev Dis Primers* 1, 15025 (2015).
- 177 2. Takahashi, K., *et al.* Sputum proteomics and airway cell transcripts of current  
178 and ex-smokers with severe asthma in U-BIOPRED: an exploratory analysis. *Eur*  
179 *Respir J* 51(2018).
- 180 3. Bigler, J., *et al.* A Severe Asthma Disease Signature from Gene Expression  
181 Profiling of Peripheral Blood from U-BIOPRED Cohorts. *Am J Respir Crit Care Med*  
182 195, 1311-1320 (2017).
- 183 4. Ohradanova-Repic, A., *et al.* The mannose 6-phosphate/insulin-like growth  
184 factor 2 receptor mediates plasminogen-induced efferocytosis. *J Leukoc Biol* 105,  
185 519-530 (2019).
- 186 5. Hasegawa, K., *et al.* Variations in the C3, C3a receptor, and C5 genes affect  
187 susceptibility to bronchial asthma. *Hum Genet* 115, 295-301 (2004).
- 188 6. Brown D, Trowsdale J, Allen R. The LILR Family: Modulators of Innate and  
189 Adaptive Immune Pathways in Health and Disease. *Tissue Antigens* 64, 215–25  
190 (2004)
- 191 7. Kardas, G., *et al.* Role of platelet-derived growth factor (PDGF) in asthma as  
192 an immunoregulatory factor mediating airway remodelling and possible  
193 pharmacological target. *Front. Pharmacol.* 11, 1-8 (2020)
- 194 8. Hedges JF, *et al.* Solute carrier 571 11A1 is expressed by innate lymphocytes  
195 and augments their activation. *J. Immunol.* 190, 4263-4273 (2013)
- 196 9. Klemann, C., Wagner, L., Stephan, M. & von Horsten, S. Cut to the chase: a  
197 review of CD26/dipeptidyl peptidase-4's (DPP4) entanglement in the immune  
198 system. *Clin Exp Immunol* 185, 1-21 (2016).
- 199
